# Supplementary material for: Apigenin Increases SHIP-1 Expression, Promotes Tumoricidal Macrophages and Anti-Tumor Immune Responses in Murine Pancreatic Cancer
Source: PubMed Central journal article supplement (PMC7761852; doi:10.3390/cancers12123631), 2020-12-04
Supplement: cancers-12-03631-s001.pdf [file cancers-12-03631-s001.pdf]

# Supplementary Materials: Apigenin Increases SHIP-1 Expression, Promotes Tumoricidal Macrophages and Anti-Tumor Immune Responses in Murine Pancreatic Cancer

Krystal Villalobos-Ayala, Ivannie Ortiz Rivera, Ciara Alvarez, Kazim Husain, DeVon DeLoach, Gerald Krystal, Margaret L Hibbs, Kun Jiang, Tomar Ghansah

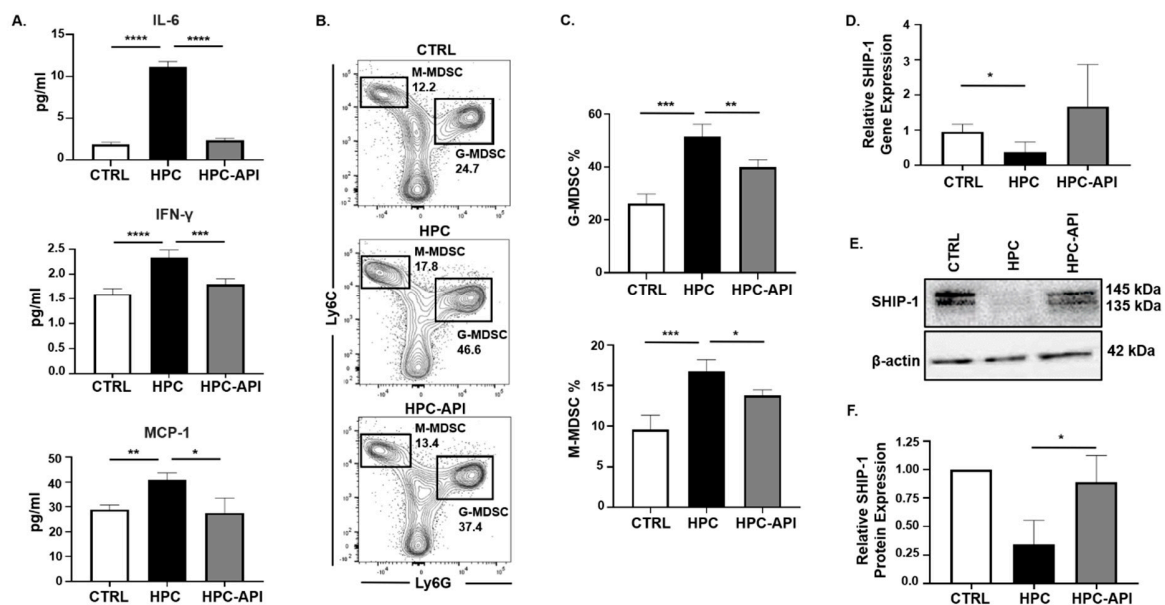

**Figure S1.** API reduces inflammation, MDSC percentages and increases SHIP-1 in HPC mice. (A.) Cytokine and chemokine profiles from the serum of CTRL, HPC and HPC-API mice as measured by Cytometric Bead Array and flow cytometry. (B. and C.) Flow cytometry analysis and representative quantification of MDSC subsets, G-MDSC (CD11b<sup>+</sup>Ly6C<sup>+</sup>Ly6G<sup>+</sup>) and M-MDSC (CD11b<sup>+</sup>Ly6G<sup>+</sup>Ly6C<sup>+</sup>), in the spleen from CTRL, HPC and HPC-API treated mice. (D.) Relative quantification of SHIP-1 gene expression in the whole splenocytes of CTRL, HPC and HPC-API mice. (E. and F.) Western blot analysis and representative quantification of normalized densitometry ratios of SHIP-1 protein levels in whole lysates from CTRL, HPC and HPC-API mice splenocytes. Data are represented as the mean  $\pm$  S.D. of CTRL (n = 3-4), HPC (n = 3-6) and HPC-API (n = 3-4) mice. \* $p$  < 0.05; \*\* $p$  < 0.01; \*\*\* $p$  < 0.001; \*\*\*\* $p$  < 0.0001 (by two-tailed  $t$  test).

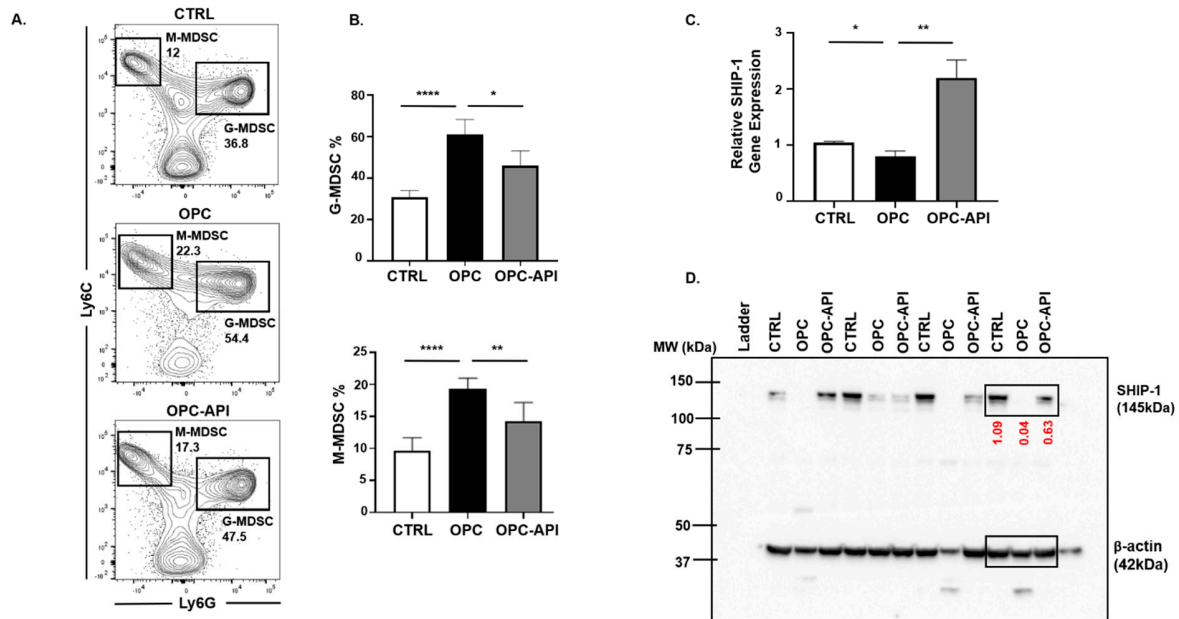

**Figure S2.** API reduces splenic MDSC subsets and increases SHIP-1 expression in OPC mice. (**A.** and **B.**) Flow cytometry analysis and representative quantification of MDSC subsets, G-MDSC ( $CD11b^+Ly6C^{+/-}Ly6G^+$ ) and M-MDSC ( $CD11b^+Ly6G^+Ly6C^+$ ), from spleens of CTRL, OPC and OPC-API treated mice. (**C.**) Relative quantification of SHIP-1 gene expression in the whole splenocytes of CTRL, OPC and OPC-API mice. (**D.**) Uncropped western blot image of SHIP-1 and  $\beta$ -actin. Bands that are bordered were used in Figure 2C and normalized densitometry ratio denoted in red (divided by  $\beta$ -actin). Data are represented as the mean  $\pm$  S.D. of CTRL (n = 3-8), OPC (n = 3-5) and OPC-API (n = 3-7) mice. \* $p < 0.05$ ; \*\* $p < 0.01$ ; \*\*\*\* $p < 0.0001$  (by two-tailed  $t$  test).

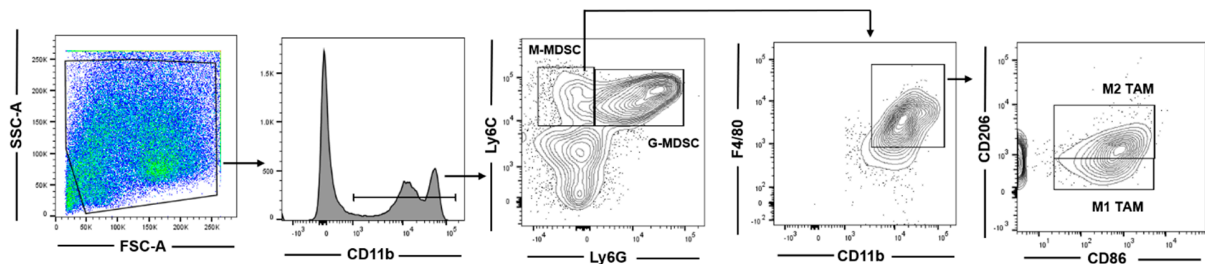

**Figure S3.** Gating strategy used to define MDSC and TAM subsets in all murine PC models used in this study. MDSC subsets were defined as, G-MDSC ( $CD11b^+Ly6C^{+/-}Ly6G^+$ ) and M-MDSC ( $CD11b^+Ly6G^+Ly6C^+$ ), and TAM subsets were defined as, M1-like TAM ( $CD11b^+Ly6C^+Ly6G^+F4/80^+CD206^-CD86^+$ ) and M2-like TAM ( $CD11b^+Ly6C^+Ly6G^-F4/80^+CD86^+CD206^+$ ).

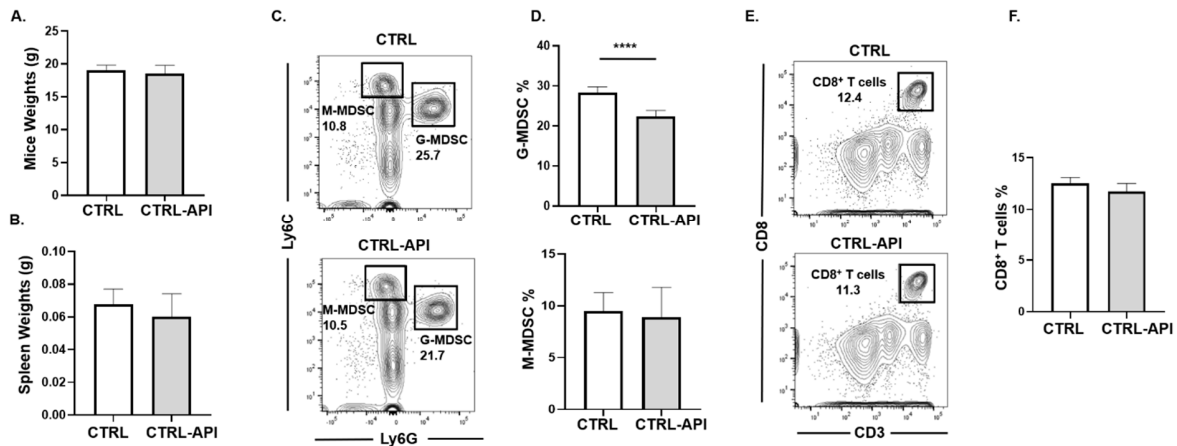

**Figure S4.** It appears that API treatment has minimal immunomodulatory effects on tumor-free C57BL/6 mice. (A. and B.) Mice and spleens weights of CTRL and CTRL-API mice at the endpoint of the study. (C. and D.) Flow cytometry analysis and representative quantification of MDSC subsets, G-MDSC (CD11b<sup>+</sup>Ly6C<sup>+</sup>/Ly6G<sup>+</sup>) and M-MDSC (CD11b<sup>+</sup>Ly6G<sup>+</sup>Ly6C<sup>+</sup>), from splenocytes of CTRL and CTRL-API treated mice. (E. and F.) Flow cytometry analysis and representative quantification of CD8<sup>+</sup> T cells (CD3<sup>+</sup>CD8<sup>+</sup>) from splenocytes of CTRL and CTRL-API treated mice. Data are representative as the mean  $\pm$  S.D. of CTRL (n = 4-7) and CTRL-API (n = 4-5) mice. \*\*\*\**p* < 0.0001 (by two-tailed *t* test).

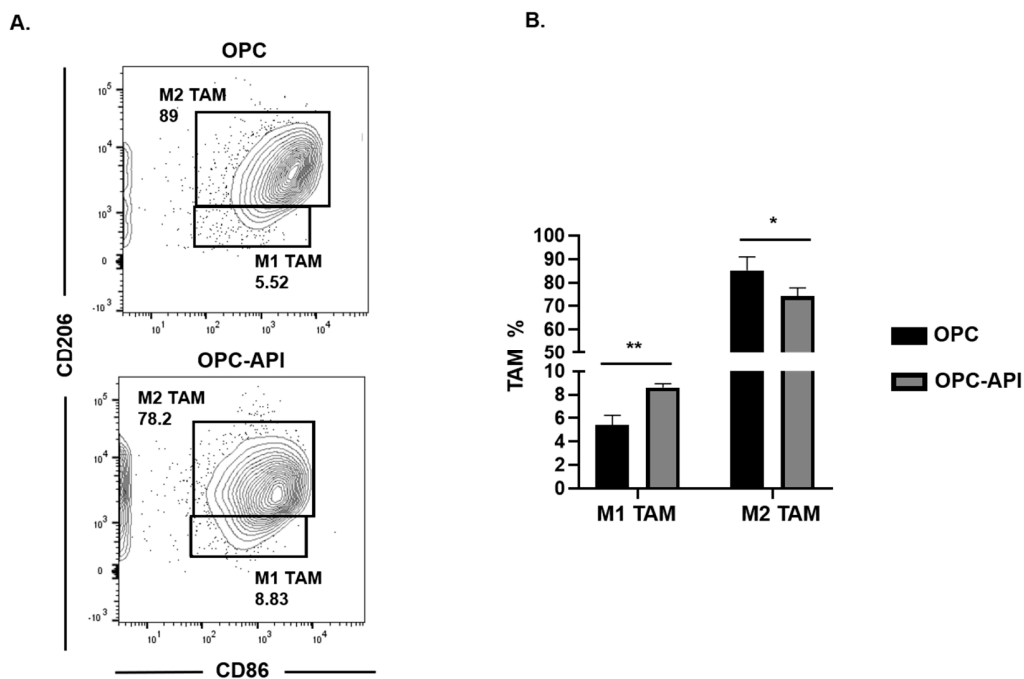

**Figure S5.** API increases Ly6C<sup>Low</sup> M1-like TAM and decreases Ly6C<sup>Low</sup> M2-like TAM in the TME of OPC mice. (A. and B.) Flow cytometry analysis and quantification of Ly6C<sup>Low</sup> TAM subsets, M1-like TAM (CD11b<sup>+</sup>Ly6C<sup>Low</sup>Ly6G-F4/80<sup>+</sup>CD206-CD86<sup>+</sup>) and M2-like TAM (CD11b<sup>+</sup>Ly6C<sup>Low</sup>Ly6G-F4/80<sup>+</sup>CD86-CD206<sup>+</sup>) in

whole pancreatic tumors from OPC and OPC-API mice. Data are represented as the mean  $\pm$  S.D. of OPC (n = 3) and OPC-API (n = 3) mice. \* $p$  < 0.05; \*\* $p$  < 0.01 (by two-tailed  $t$  test).

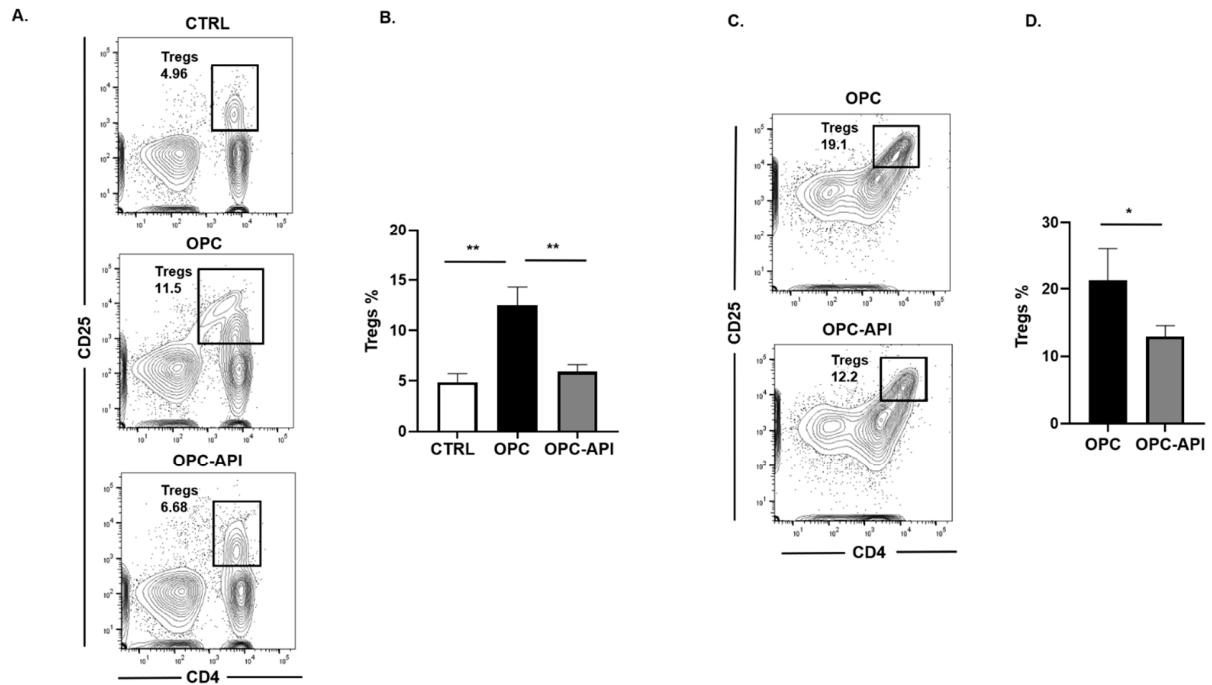

**Figure S6.** API decreases Treg percentages in the spleen and TME of OPC mice. Flow cytometry analysis and representative quantification of Tregs (CD3<sup>+</sup>CD4<sup>+</sup>CD25<sup>+</sup>) in the spleen (A. and B.) and pancreatic tumor (C. and D.) of CTRL, OPC, and OPC-API mice. Data are represented as the mean  $\pm$  S.D. of CTRL (n = 3), OPC (n = 3) and OPC-API (n = 3) mice. \* $p$  < 0.05; \*\* $p$  < 0.01 (by two-tailed  $t$  test).

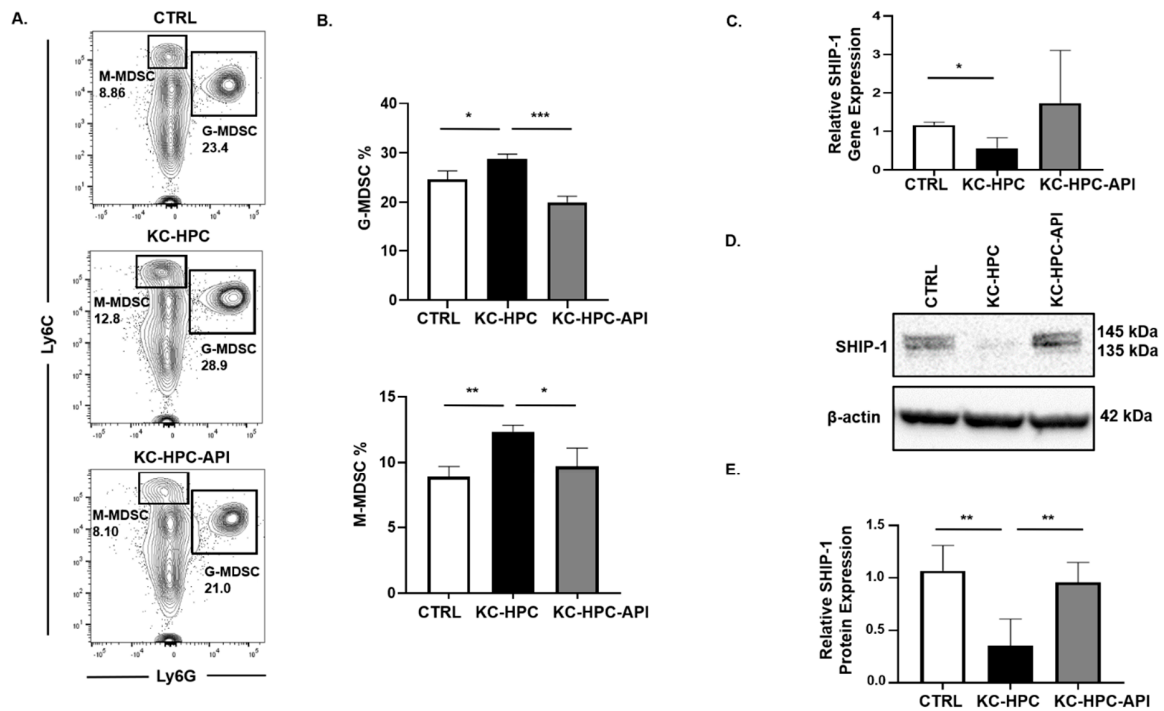

**Figure S7.** API reduces proportion of splenic MDSC subsets and increases SHIP-1 expression in KC-HPC mice. (A. and B.) Flow cytometry analysis and representative quantification of MDSC subsets, G-MDSC (CD11b<sup>+</sup>Ly6C<sup>-</sup>Ly6G<sup>+</sup>) and M-MDSC (CD11b<sup>+</sup>Ly6C<sup>+</sup>Ly6G<sup>-</sup>), from spleens of CTRL, KC-HPC and KC-HPC-API treated mice. (C.) Relative quantification of SHIP-1 gene expression in the whole splenocytes of CTRL, KC-HPC and KC-HPC-API mice. (D. and E.) Western blot analysis and representative quantification of normalized densitometry ratios of SHIP-1 protein levels in whole cell lysates from CTRL, KC-HPC and KC-HPC-API mice splenocytes. Data are represented as the mean  $\pm$  S.D. of CTRL (n = 3), KC-HPC (n = 3-4) and KC-HPC-API (n = 3-4) mice. \* $p < 0.05$ ; \*\* $p < 0.01$ ; \*\*\* $p < 0.001$  (by two-tailed *t* test).

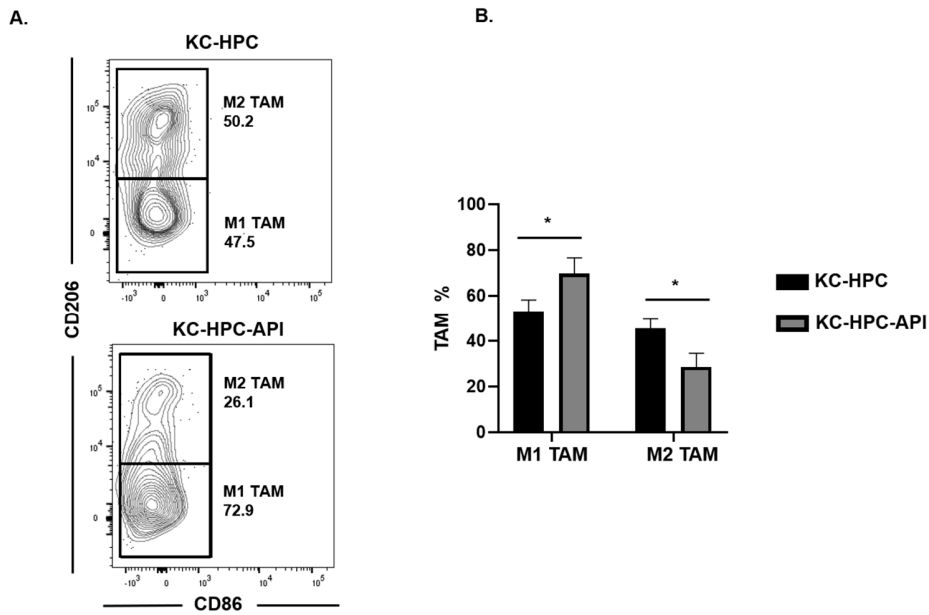

**Figure S8.** API increases Ly6C<sup>Low</sup> M1-like TAM and decreases Ly6C<sup>Low</sup> M2-like TAM in the TME of KC-HPC mice. (A. and B.) Flow cytometry analysis and quantification of Ly6C<sup>Low</sup> TAM subsets, M1-like TAM (CD11b<sup>+</sup>Ly6C<sup>Low</sup>Ly6G-F4/80<sup>+</sup>CD206-CD86<sup>+</sup>) and M2-like TAM (CD11b<sup>+</sup>Ly6C<sup>Low</sup>Ly6G-F4/80<sup>+</sup>CD86-CD206<sup>+</sup>) in whole tumors from KC-HPC and KC-HPC-API mice. Data are represented as the mean  $\pm$  S.D. of KC-HPC (n = 3) and KC-HPC-API (n = 3) mice. \* $p < 0.05$  (by two-tailed *t* test).

A.

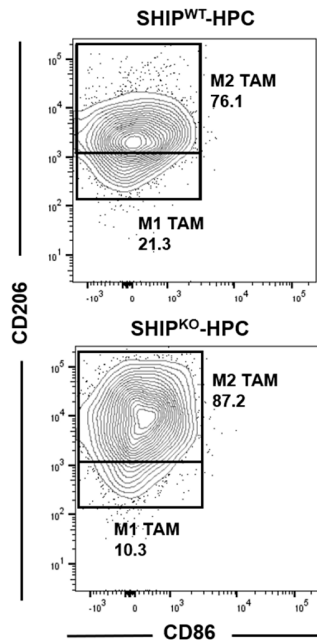

B.

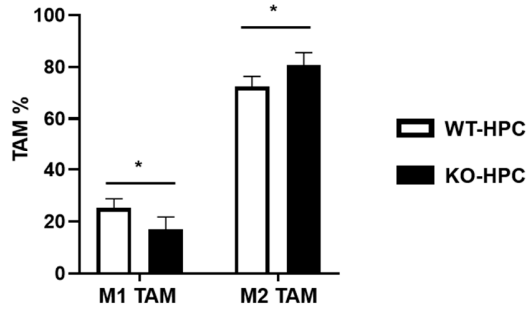

**Figure S9.** SHIP-1 expression controls the development of Ly6C<sup>Low</sup> M1-like TAM in HPC. (A. and B.) Flow cytometry analysis and quantification of Ly6C<sup>Low</sup> TAM subsets, M1-like TAM (CD11b<sup>+</sup>Ly6C<sup>Low</sup>Ly6G-F4/80<sup>+</sup>CD206-CD86<sup>+</sup>) and M2-like TAM (CD11b<sup>+</sup>Ly6C<sup>Low</sup>Ly6G-F4/80<sup>+</sup>CD86-CD206<sup>+</sup>) in the whole tumors of SHIP<sup>WT</sup>-HPC and SHIP<sup>KO</sup>-HPC mice. SHIP<sup>WT</sup>-HPC (WT-HPC) and SHIP<sup>KO</sup>-HPC (KO-HPC). Data are represented as the mean  $\pm$  S.D. of SHIP<sup>WT</sup>-HPC (n = 3) and SHIP<sup>KO</sup>-HPC (n = 5) mice. \**p* < 0.05 (by two-tailed t test).

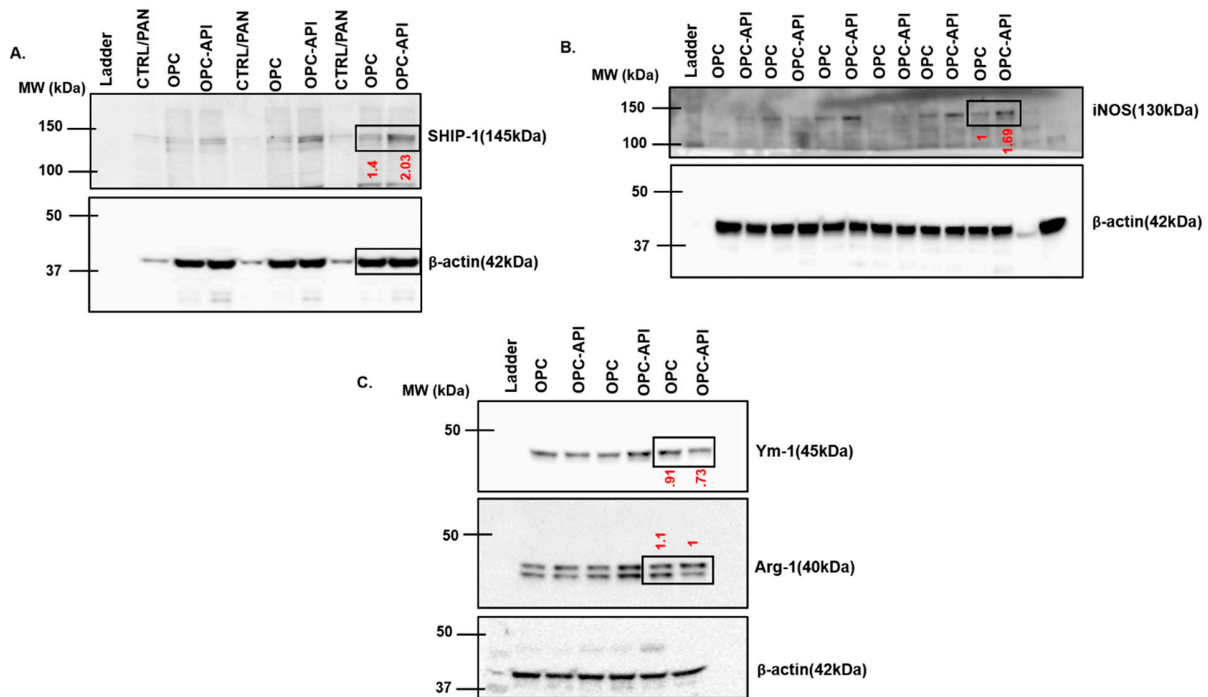

**Figure S10.** Uncropped western blot images from Figure 6D. Uncropped western blot images of SHIP-1 (A.), iNOS (B.), Ym-1 (C.), Arg-1 (C.) and  $\beta$ -actin. Bands that are bordered were used in Figure 6D and normalized densitometry ratio denoted in red (divided by  $\beta$ -actin).

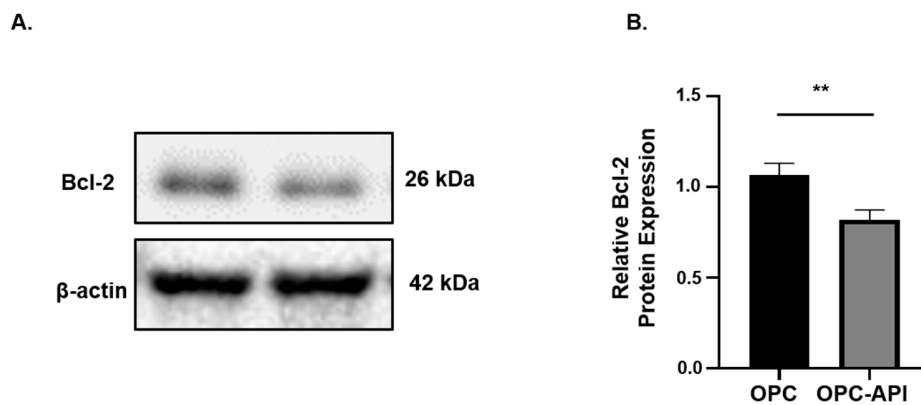

**Figure S11.** API decreases the anti-apoptotic protein, Bcl-2, in the TME of OPC mice. (A. and B.) Western blot analysis and quantification of normalized densitometry ratios of Bcl-2 protein in whole cell lysates from vehicle treated OPC mice and API treated OPC mice tumors. Data are represented as the mean  $\pm$  S.D. of OPC (n = 3) and OPC-API (n = 3) mice.  $**p < 0.01$  (by two-tailed *t* test).



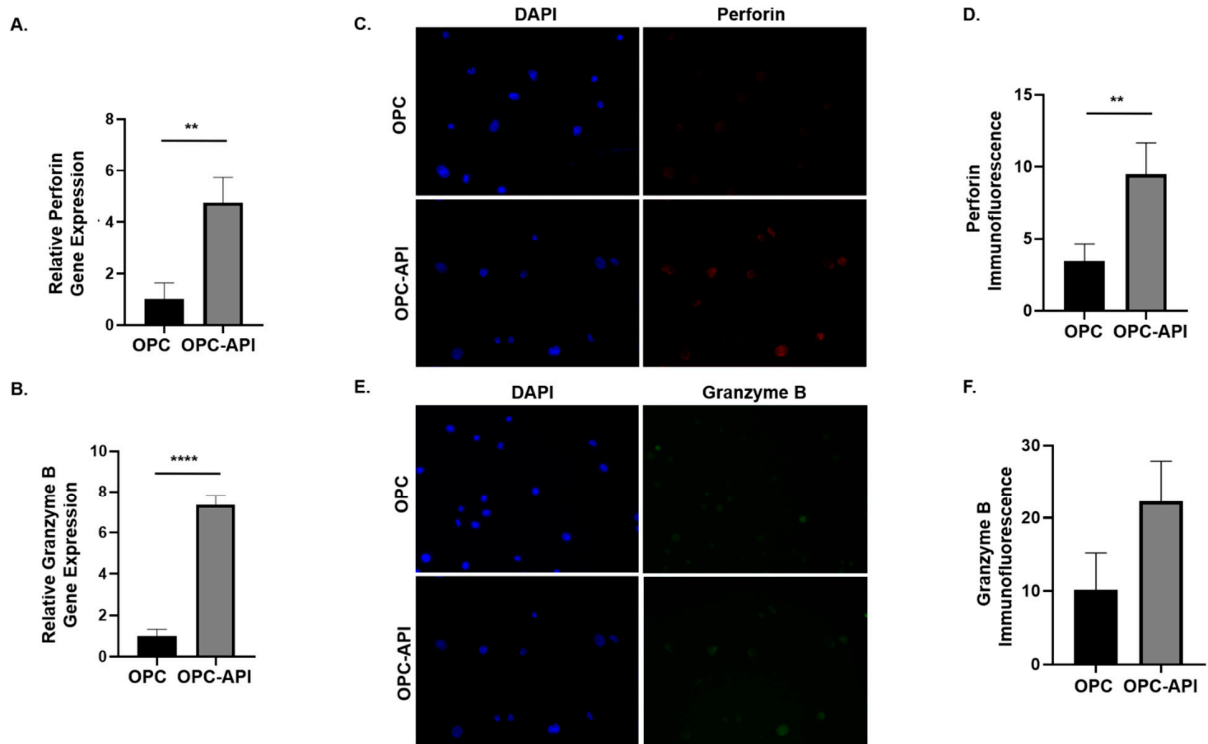

**Figure S12.** API increases Perforin and Granzyme B expression in the TME of OPC mice. (A. and B.) Relative quantification of perforin and granzyme B gene expression in the whole pancreatic tumors of OPC and OPC-API mice. Fluorescent microscopy images ( $40\times$ ) and representative quantification of perforin (red) (C. and D.) and granzyme B (green) (E. and F.) immunofluorescences from the pancreatic tumor of OPC and OPC-API mice. Nuclear DNA appears as blue (DAPI). Data are representative as the mean  $\pm$  S.D. of OPC ( $n = 3$ ) and OPC-API ( $n = 3-4$ ) mice.  $**p < 0.01$ ;  $****p < 0.0001$  (by two-tailed  $t$  test).

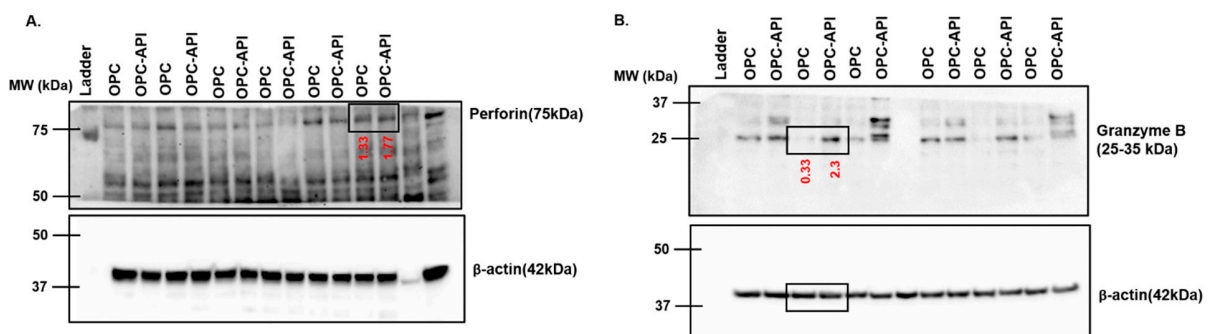

**Figure S13.** Uncropped western blot images from Figure 7G. Uncropped western blot images of Perforin (A.), Granzyme B (B.) and  $\beta$ -actin. Bands that are bordered were used in Figure 7G and normalized densitometry ratio denoted in red (divided by  $\beta$ -actin).
